# Supplementary material
Source: MDPI journal article supplement (https://www.mdpi.com/search?q=materials-12-01974)

Supplementary Materials

# Catalytically Active Imine-based Covalent Organic Frameworks for Detoxification of Nerve Agent Simulants in Aqueous Media

Sergio Royuela <sup>1,2</sup>, Rodrigo Gil-San Millán <sup>3</sup>, María J. Mancheño <sup>1</sup>, M. Mar Ramos <sup>2</sup>,  
José L. Segura <sup>1,\*</sup>, Jorge A. R. Navarro <sup>3,\*</sup> and Félix Zamora <sup>4,5,6,7,\*</sup>

<sup>1</sup> Departamento de Química Orgánica I, Facultad de CC. Químicas, Universidad Complutense de Madrid, 28040 Madrid, Spain; s.royuela@ucm.es (S.R.); mjmreal@quim.ucm.es (M.J.M.);

<sup>2</sup> Departamento de Tecnología Química y Ambiental, Universidad Rey Juan Carlos, 28933 Madrid, Spain; mariamar.ramos@urjc.es

<sup>3</sup> Departamento de Química Inorgánica, Universidad de Granada, 18071 Granada, Spain; rodrigsm@correo.ugr.es

<sup>4</sup> Departamento de Inorgánica, Facultad de Ciencias, Universidad Autónoma de Madrid, 28049 Madrid, Spain

<sup>5</sup> Institute for Advanced Research in Chemical Sciences (IAdChem), Universidad Autónoma de Madrid, 28049 Madrid, Spain

<sup>6</sup> Condensed Matter Physics Center (IFIMAC), Universidad Autónoma de Madrid, 28049 Madrid, Spain

<sup>7</sup> Instituto Madrileño de Estudios Avanzados en Nanociencia (IMDEA-Nanociencia), Cantoblanco, E-28049 Madrid, Spain

\* Correspondence: segura@quim.ucm.es (J.L.S.); jarn@ugr.es (J.A.R.N.); felix.zamora@uam.es (F.Z.)

## FTIR spectra of COFs

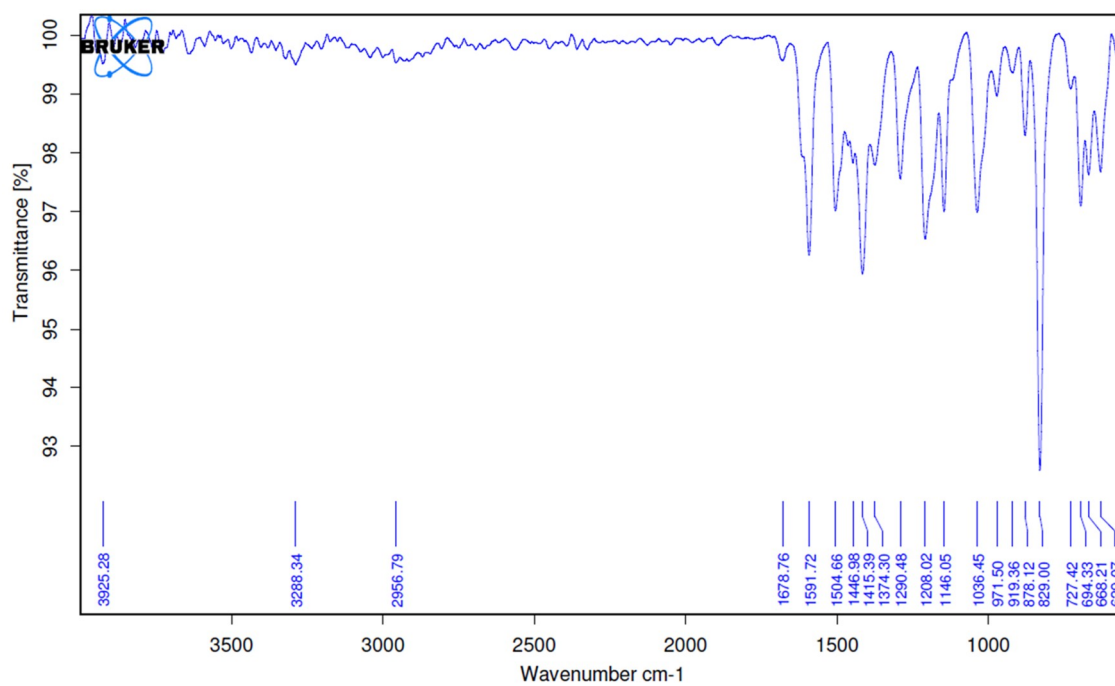

Figure S1. FTIR (ATR) spectrum of [HC≡C]<sub>0.5</sub>-TPB-DMTP-COF.

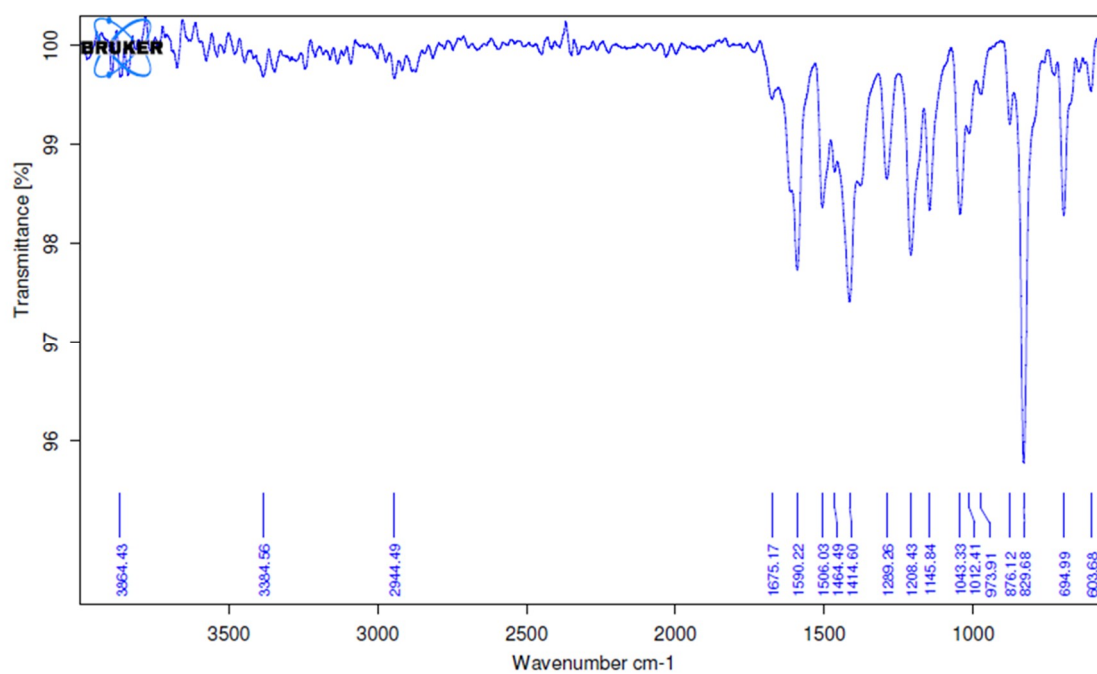

Figure S2. FTIR (ATR) spectrum of [(S)-Py]<sub>0.5</sub>-TPB-DMTP-COF.

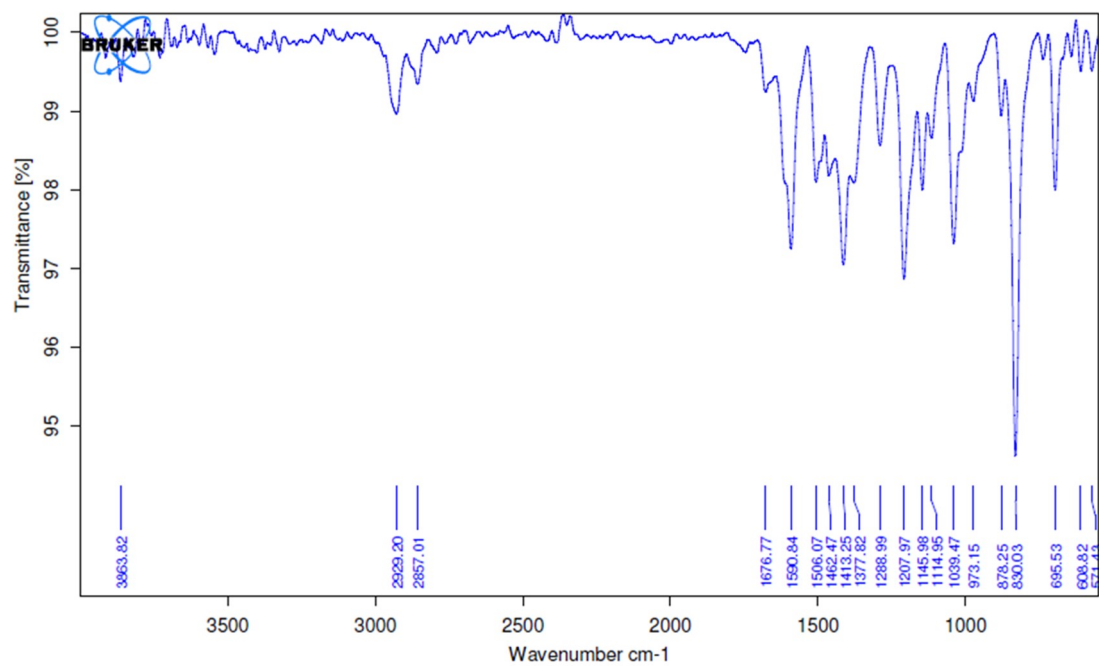

Figure S3. FTIR (ATR) spectrum of 2-step-[(S)-PyMe]<sub>0.5</sub>-TPB-DMTP-COF.

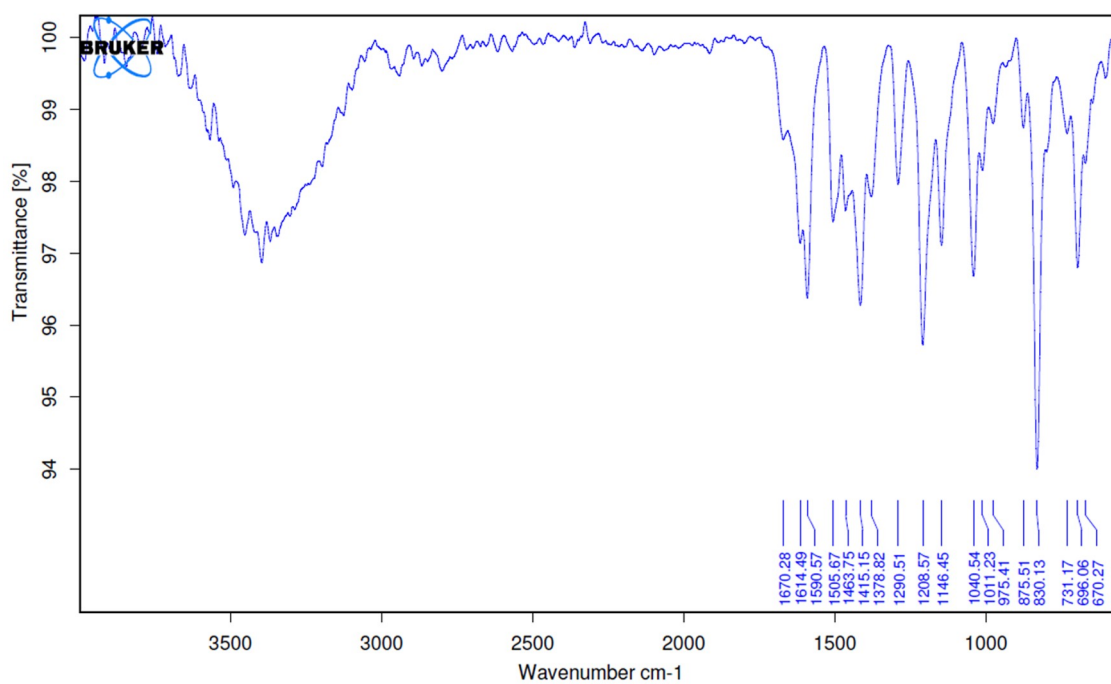

Figure S4. FTIR (ATR) spectrum of 2-step-[(S)-PyMe]<sub>0.5</sub>-TPB-DMTP-COF.

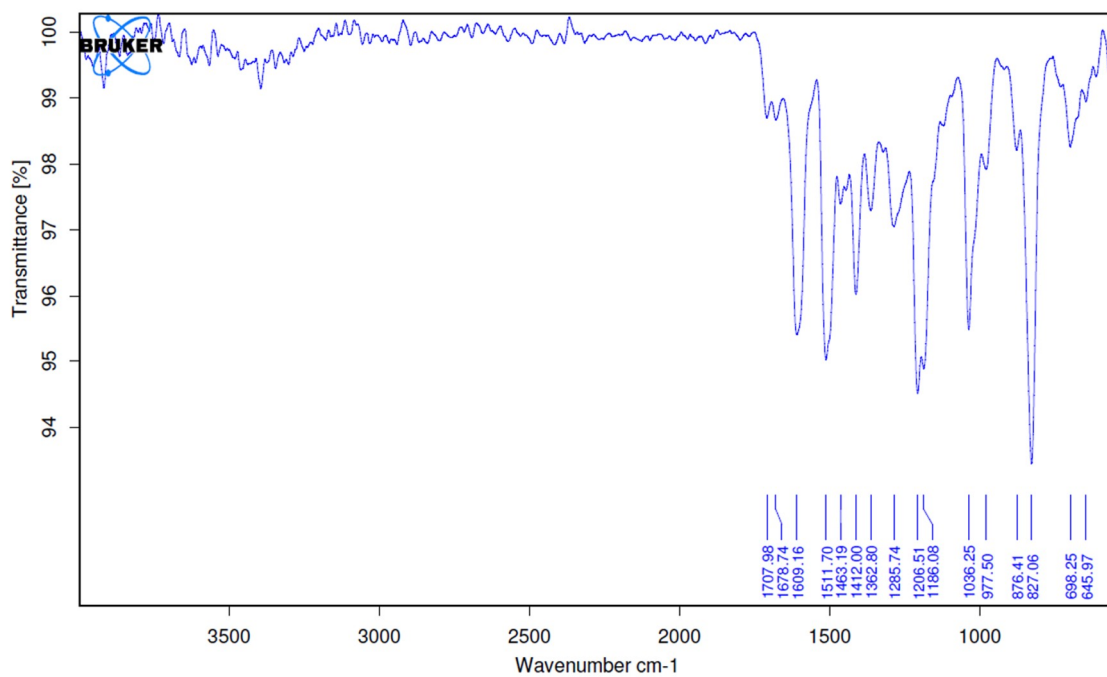

- <sup>13</sup>C CP/MAS NMR spectra of COFs

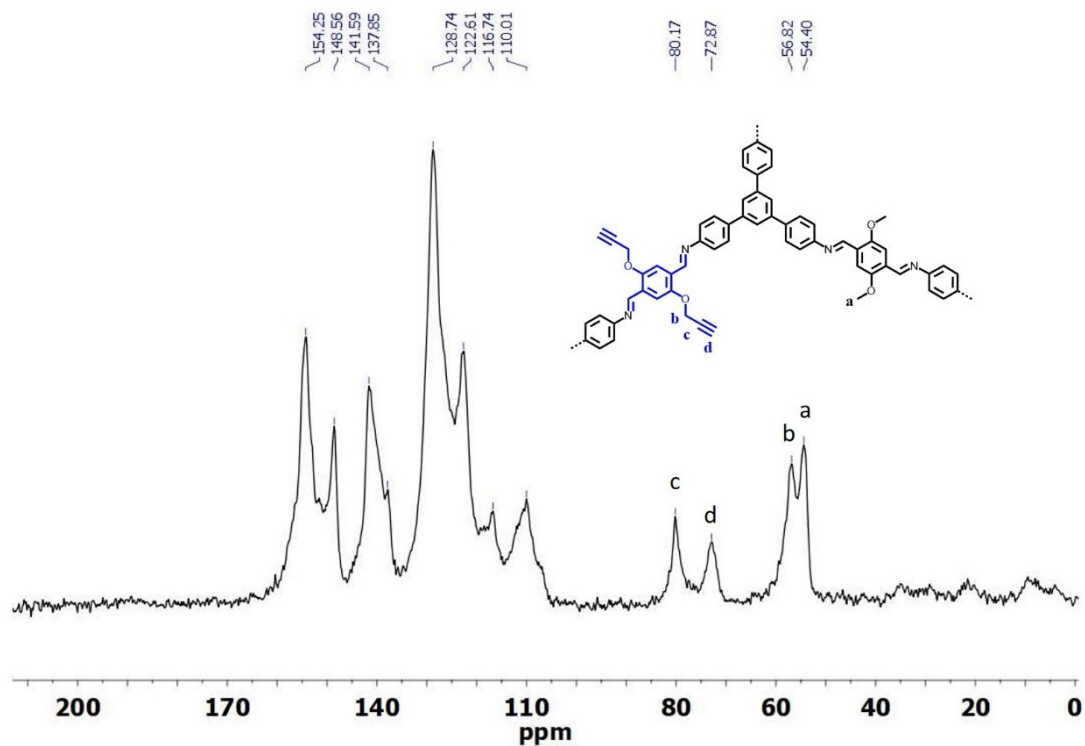

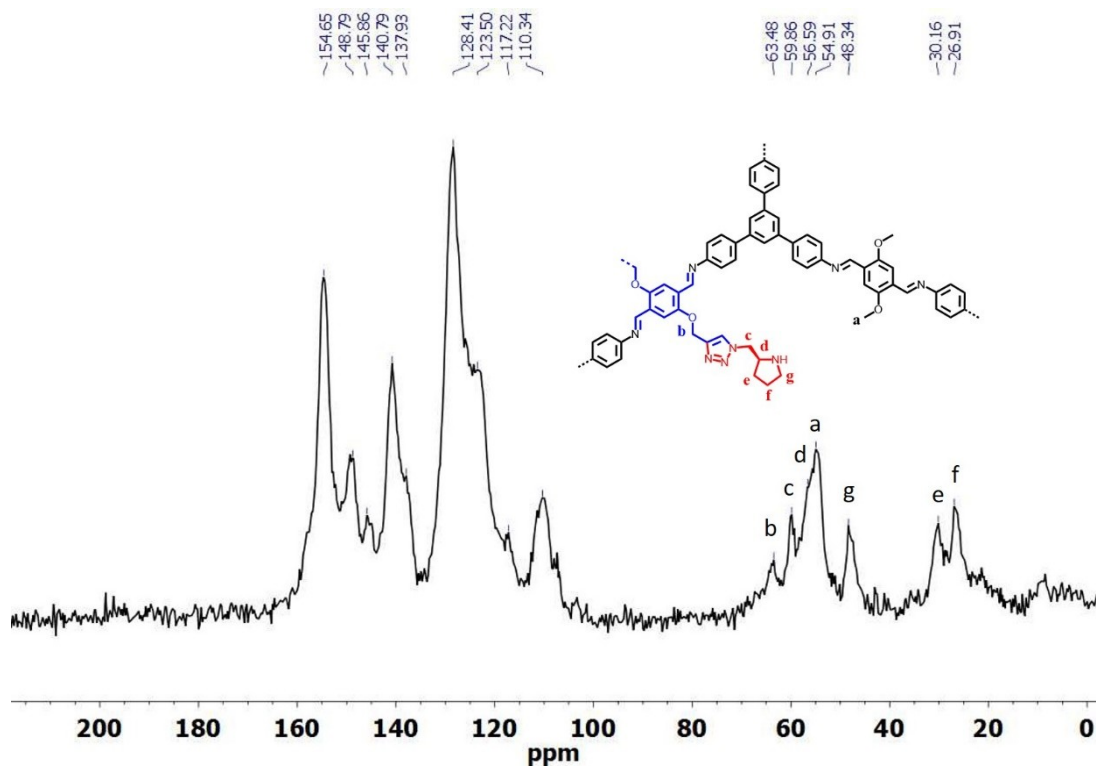Figure S7.  $^{13}\text{C}$  CP/MAS NMR of  $[(\text{S})\text{-Py}]_{0.5}\text{-TPB-DMTP-COF}$ .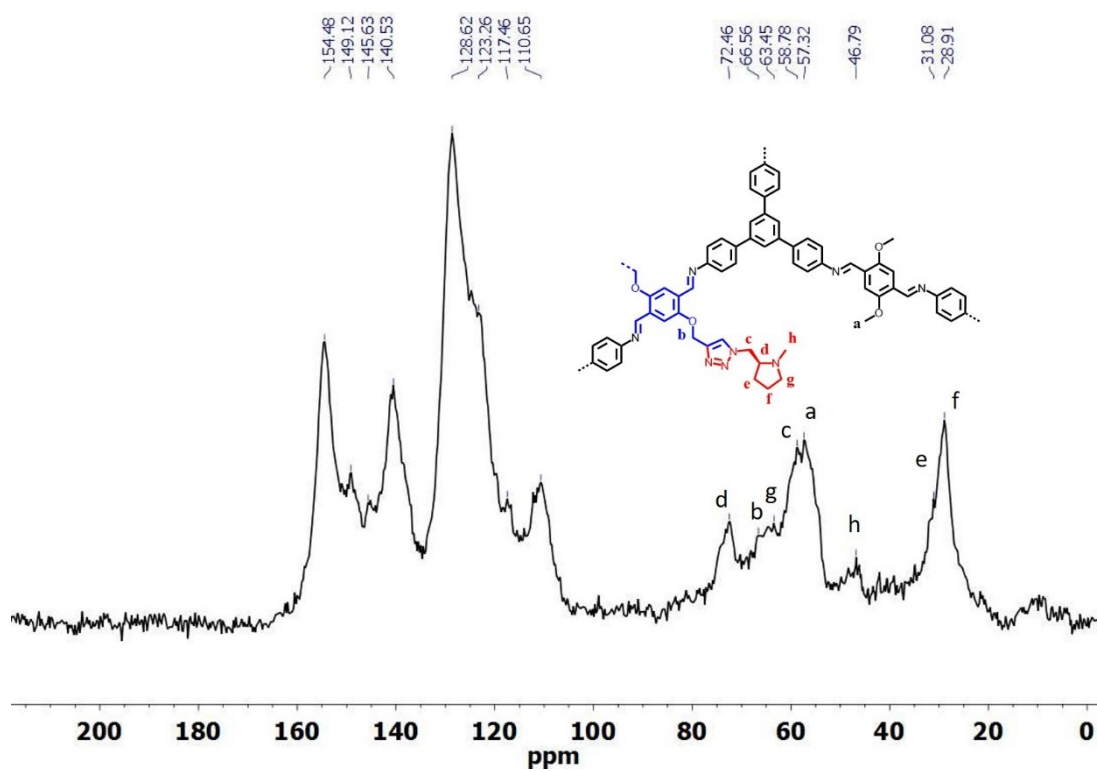Figure S8.  $^{13}\text{C}$  CP/MAS NMR of 2-step- $[(\text{S})\text{-PyMe}]_{0.5}\text{-TPB-DMTP-COF}$ .

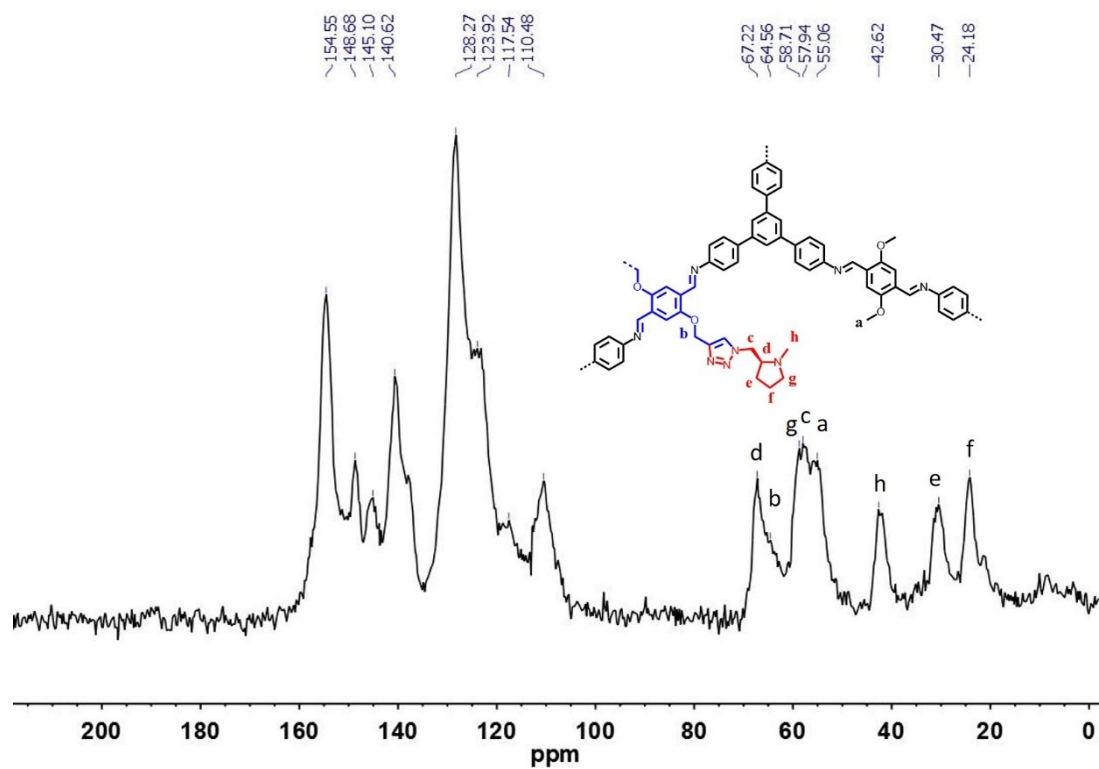

Figure S9.  $^{13}\text{C}$  CP/MAS NMR of 1-step-[(S)-PyMe] $_{0.5}$ -TPB-DMTP-COF.

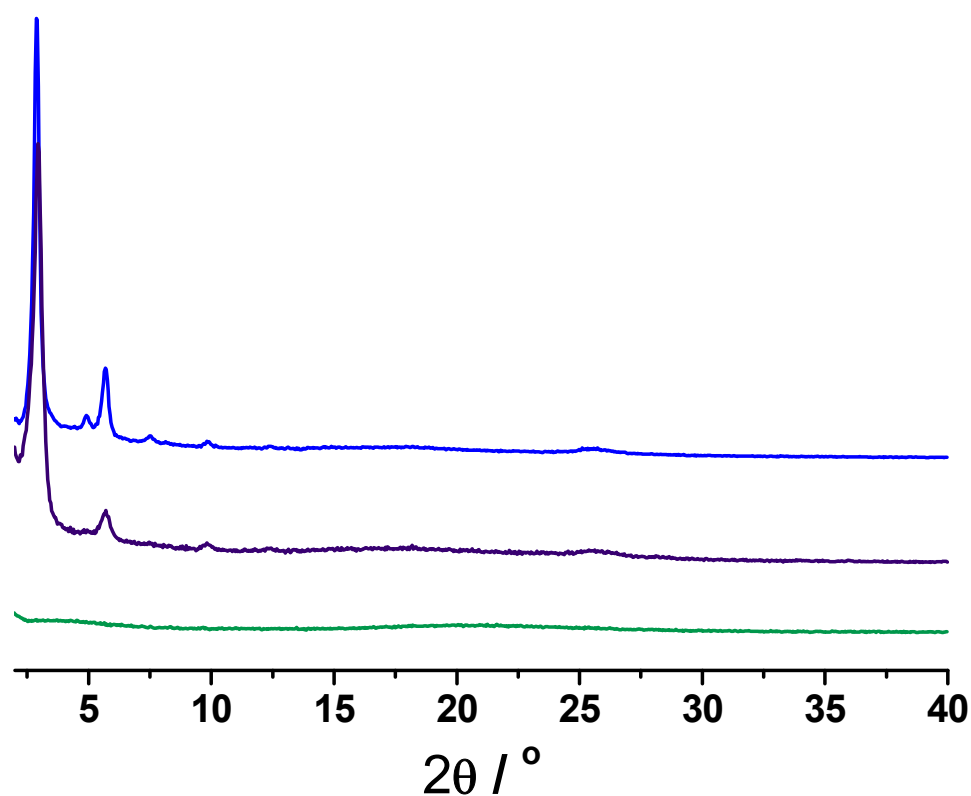

Figure S10. PXRD of 1-step-[(S)-PyMe]<sub>0.5</sub>-TPB-DMTP-COF (blue), 2-step-[(S)-PyMe]<sub>0.5</sub>-TPB-DMTP-COF (purple) and [(S)-PyMe]<sub>0.5</sub>-TPB-DMTP-Polym (green).

Table S1. Lattice parameters of the synthesized COFs.

|                                                | a = b<br>(Å) | c (Å) | $\alpha = \beta$ (°) | $\gamma$ (°) |
|------------------------------------------------|--------------|-------|----------------------|--------------|
| [HC≡C] <sub>0.5</sub> -TPB-DMTP-COF            | 35.3         | 3.50  | 90                   | 120          |
| [(S)-Py] <sub>0.5</sub> -TPB-DMTP-COF          | 34.7         | 3.51  | 90                   | 120          |
| 2-step-[(S)-PyMe] <sub>0.5</sub> -TPB-DMTP-COF | 35.5         | 3.50  | 90                   | 120          |
| 1-step-[(S)-PyMe] <sub>0.5</sub> -TPB-DMTP-COF | 35.7         | 3.50  | 90                   | 120          |

- Characterization of materials by N<sub>2</sub> (77 K) and CO<sub>2</sub> (273 K) adsorption

**Table S2.** Summary of textural properties of COF materials from N<sub>2</sub> adsorption measurements at 77

K.

|                                                | BET surface area<br>(m <sup>2</sup> g <sup>-1</sup> ) | Pore volume<br>(cm <sup>3</sup> g <sup>-1</sup> ) | Pore size<br>(nm) |
|------------------------------------------------|-------------------------------------------------------|---------------------------------------------------|-------------------|
| [HC≡C] <sub>0.5</sub> -TPB-DMTP-COF            | 3440                                                  | 3.0                                               | 3.6               |
| [(S)-Py] <sub>0.5</sub> -TPB-DMTP-COF          | 1030                                                  | 0.40                                              | 3.3               |
| 2-step-[(S)-PyMe] <sub>0.5</sub> -TPB-DMTP-COF | 95                                                    | 0.06                                              | 2.9               |
| 1-step-[(S)-PyMe] <sub>0.5</sub> -TPB-DMTP-COF | 318                                                   | 0.20                                              | 3.0               |
| [(S)-PyMe] <sub>0.5</sub> -TPB-DMTP-Polym      | 7.5                                                   | -                                                 | -                 |

**N<sub>2</sub> adsorption isotherms**

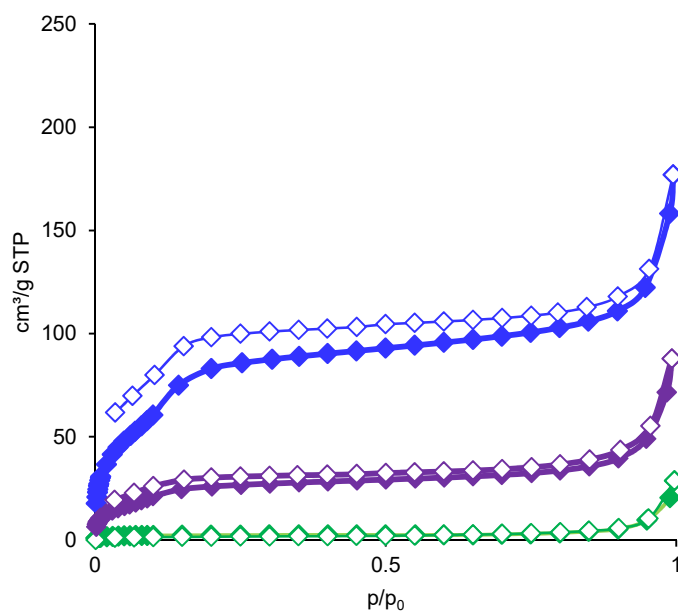

**Figure S11.** N<sub>2</sub> (77 K) adsorption isotherms for 1-step-[(S)-PyMe]<sub>0.5</sub>-TPB-DMTP-COF (blue), 2-step-[(S)-PyMe]<sub>0.5</sub>-TPB-DMTP-COF (purple) and [(S)-PyMe]<sub>0.5</sub>-TPB-DMTP-Polym (green).



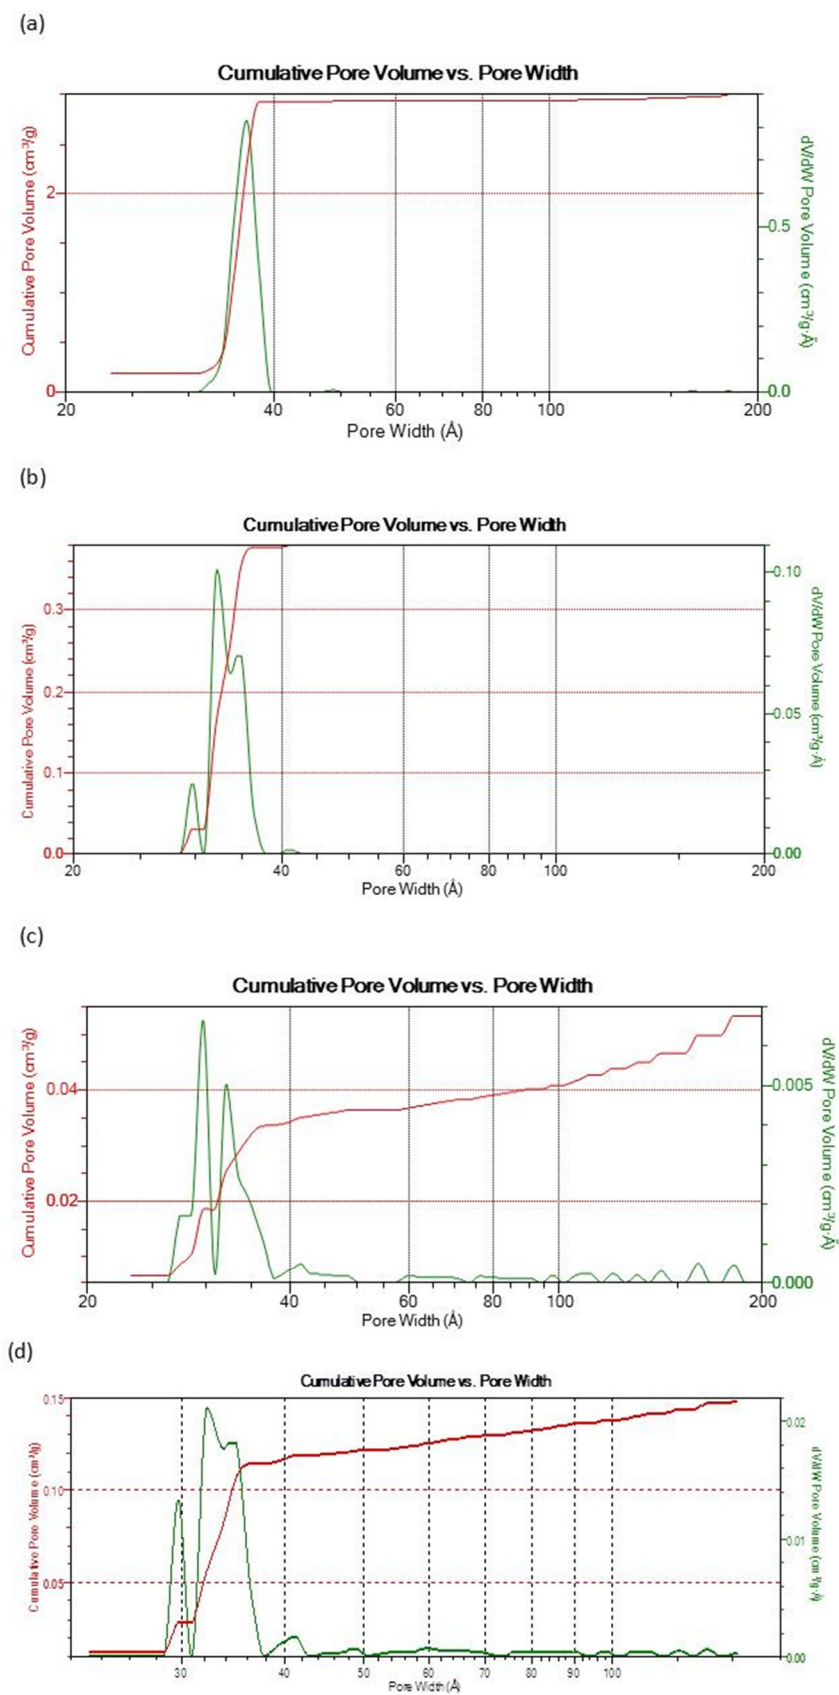

**Figure S12.** NLDFT pore size distribution for the essayed COF materials [HC≡C]<sub>0.5</sub>-TPB-DMTP-COF (a), [(S)-Py]<sub>0.5</sub>-TPB-DMTP-COF (b), 2-step-[(S)-PyMe]<sub>0.5</sub>-TPB-DMTP-COF (c) and 1-step-[(S)-PyMe]<sub>0.5</sub>-TPB-DMTP-COF (d).

CO<sub>2</sub> adsorption isotherms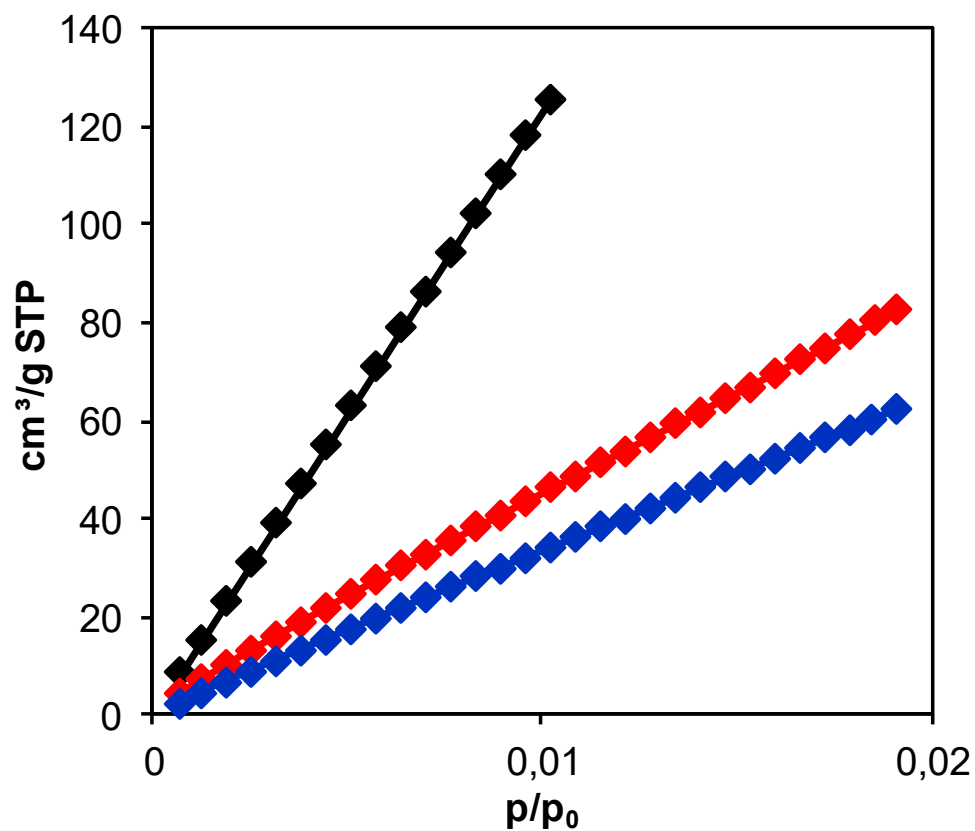

**Figure S13.** CO<sub>2</sub> (298 K) adsorption isotherms for [HC≡C]<sub>0.5</sub>-TPB-DMTP-COF (black), [(S)-Py]<sub>0.5</sub>-TPB-DMTP-COF (red) and [(S)-PyMe]<sub>0.5</sub>-TPB-DMTP-COF (blue).

## - SEM images

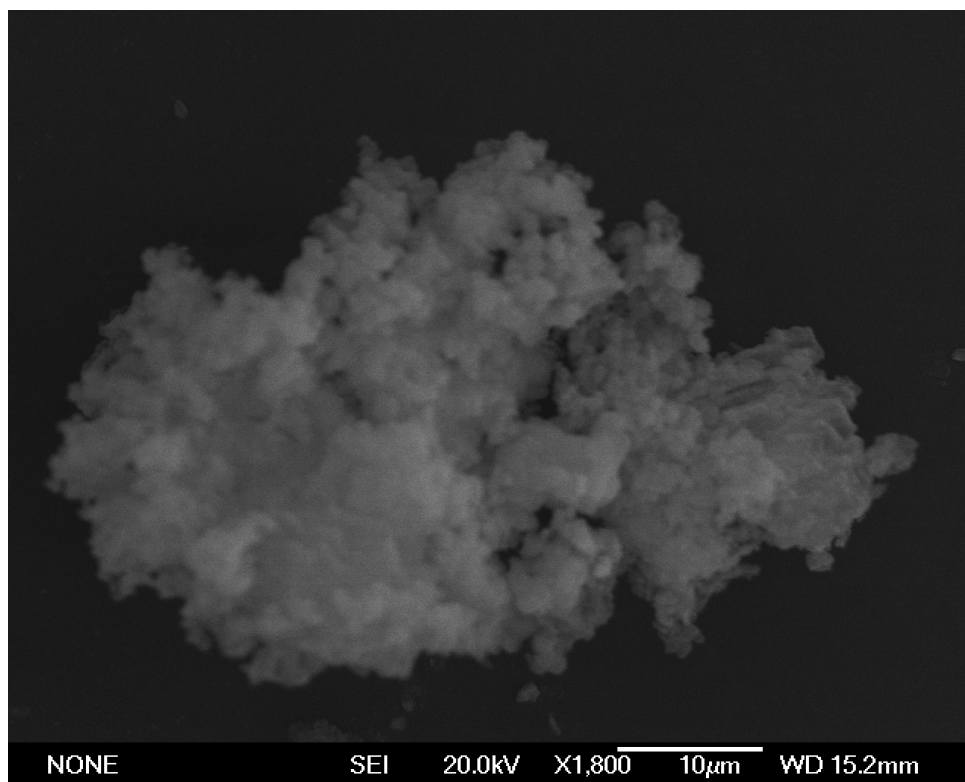

Figure S14. SEM image of [(S)-Py]<sub>0.5</sub>-TPB-DMTP-COF.

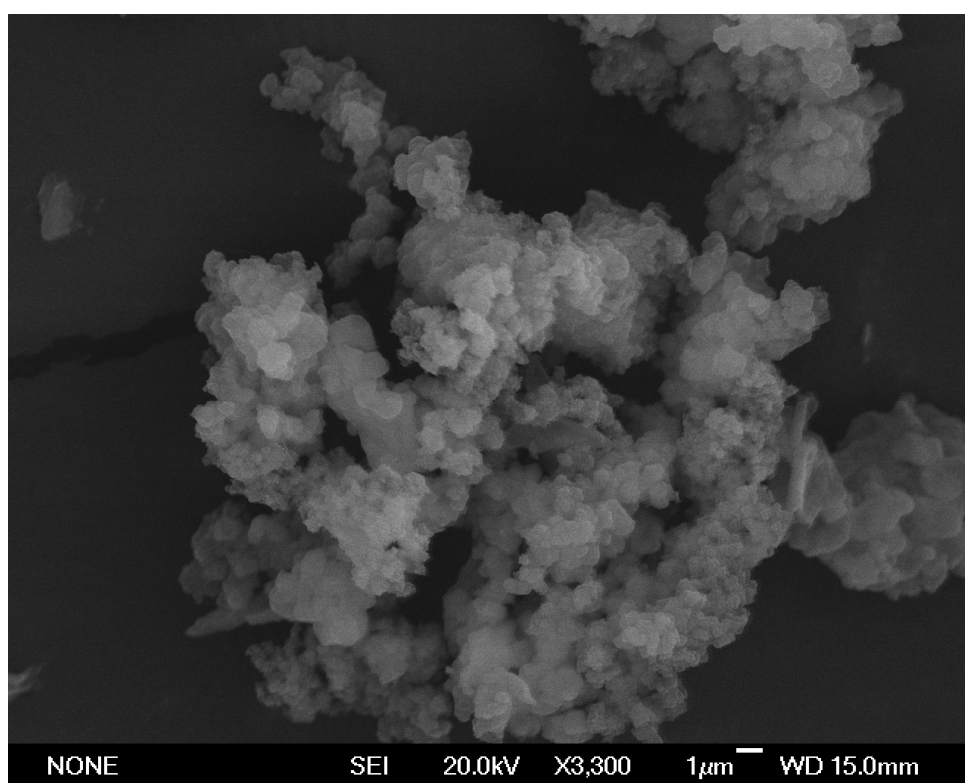

Figure S15. SEM image of 2-step-[(S)-PyMe]<sub>0.5</sub>-TPB-DMTP-COF.

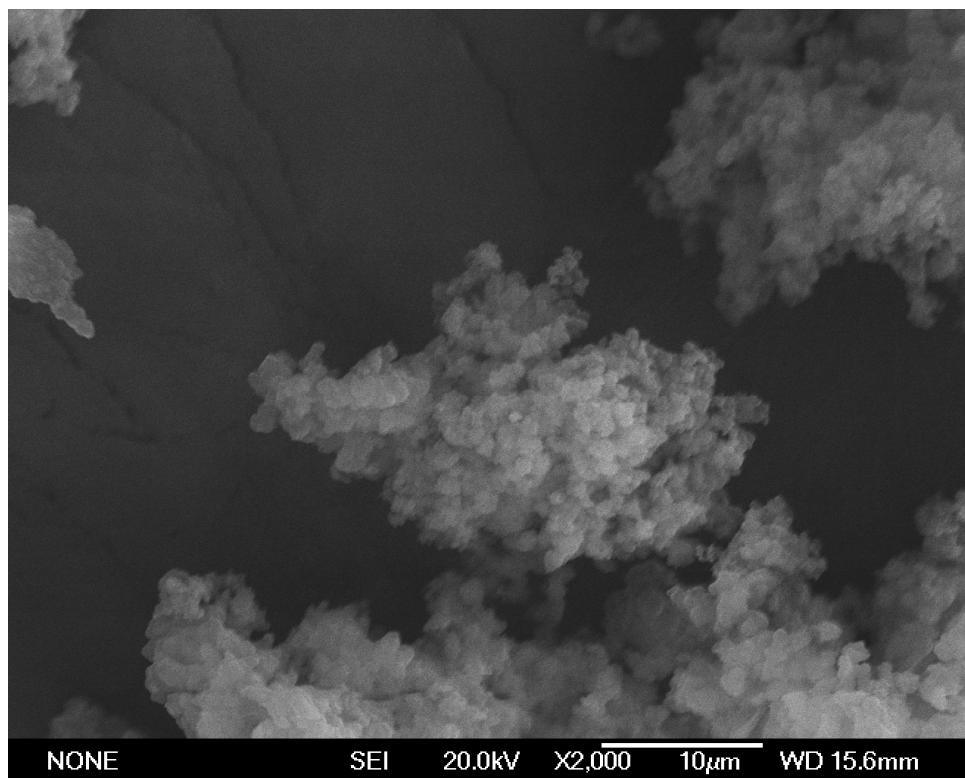

Figure S16. SEM image of 1-step-[(S)-PyMe]<sub>0.5</sub>-TPB-DMTP-COF.

- TGA of COFs

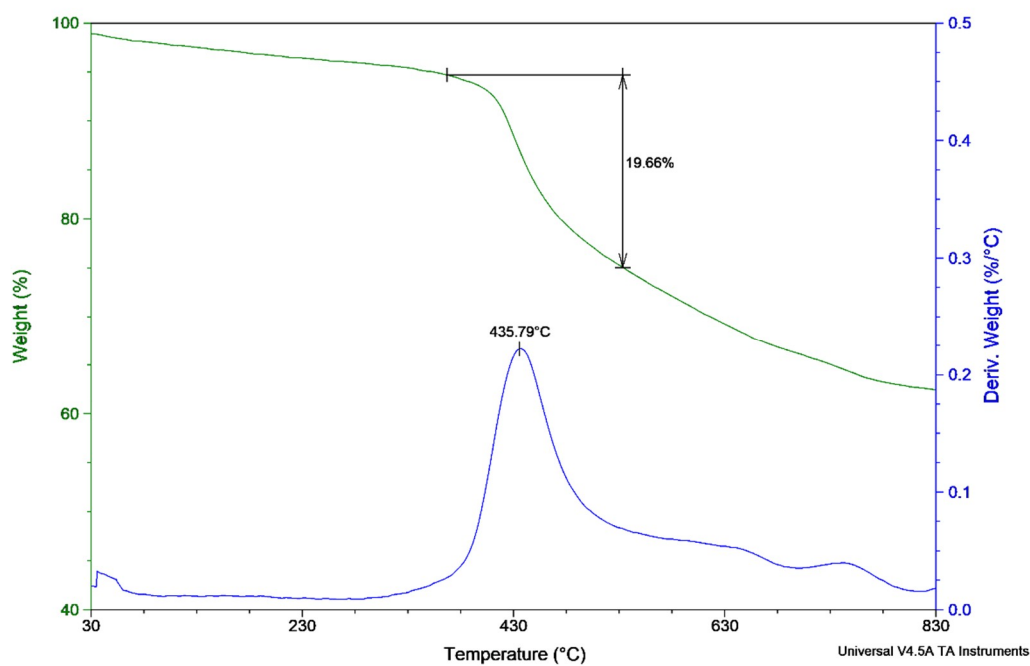

Figure S17. TGA profile of [HC≡C]<sub>0.5</sub>-TPB-DMTP-COF.

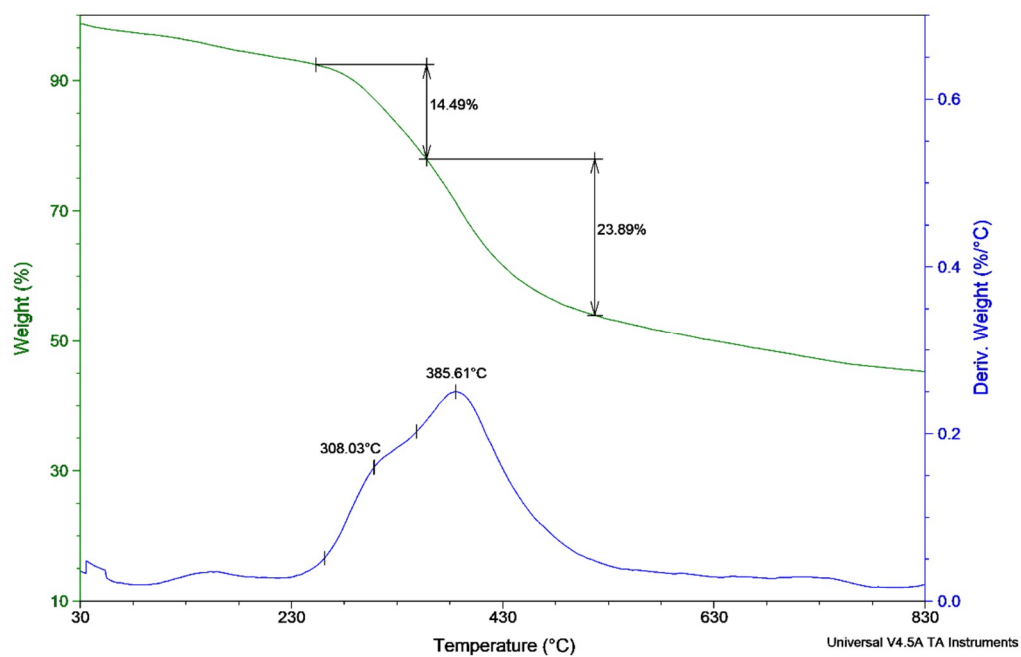

Figure S18. TGA profile of [(S)-Py]<sub>0.5</sub>-TPB-DMTP-COF.

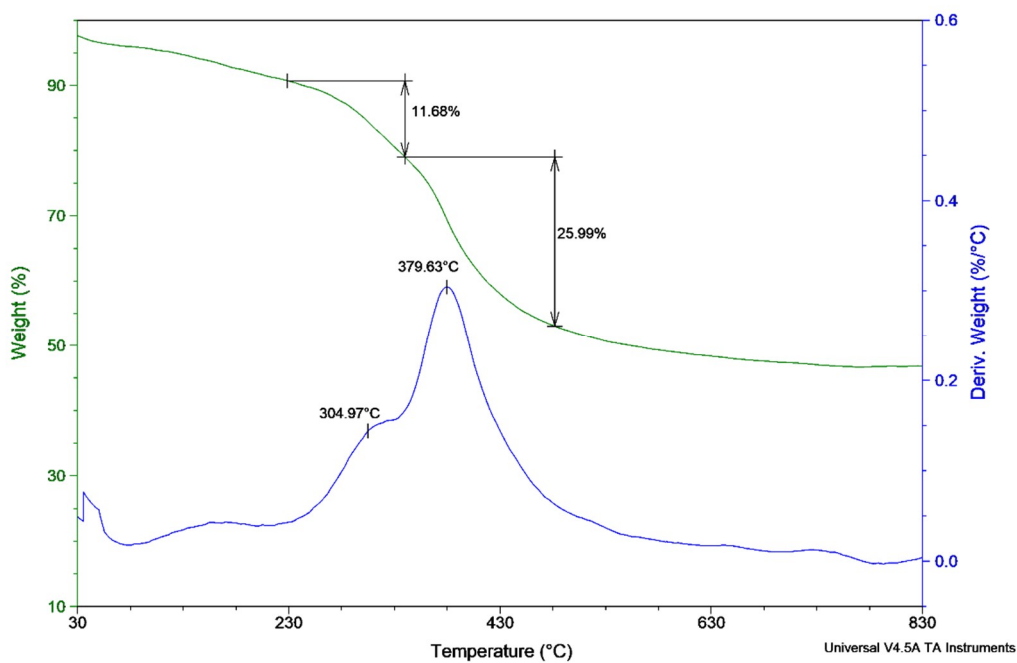

Figure S19. TGA profile of 2-step-[(S)-PyMe]<sub>0.5</sub>-TPB-DMTP-COF.

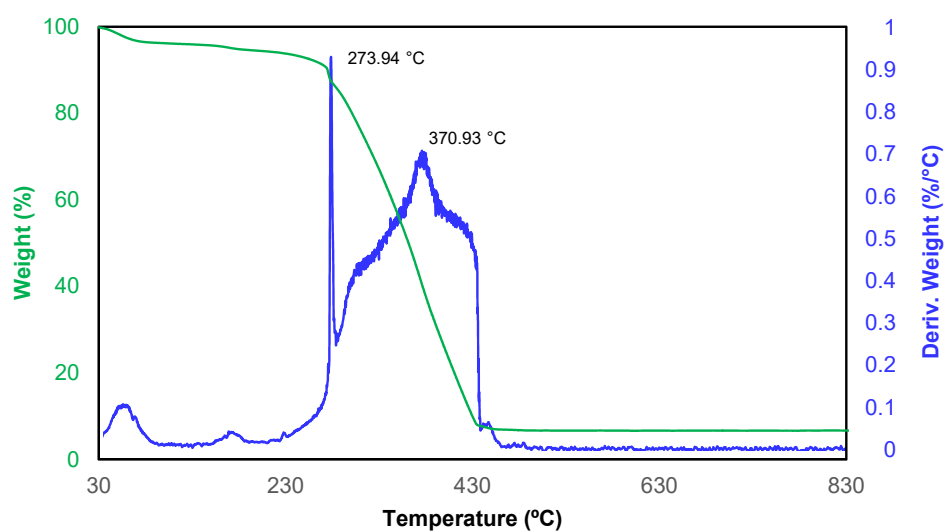

Figure S20. TGA profile of 1-step-[(S)-PyMe]<sub>0.5</sub>-TPB-DMTP-COF.

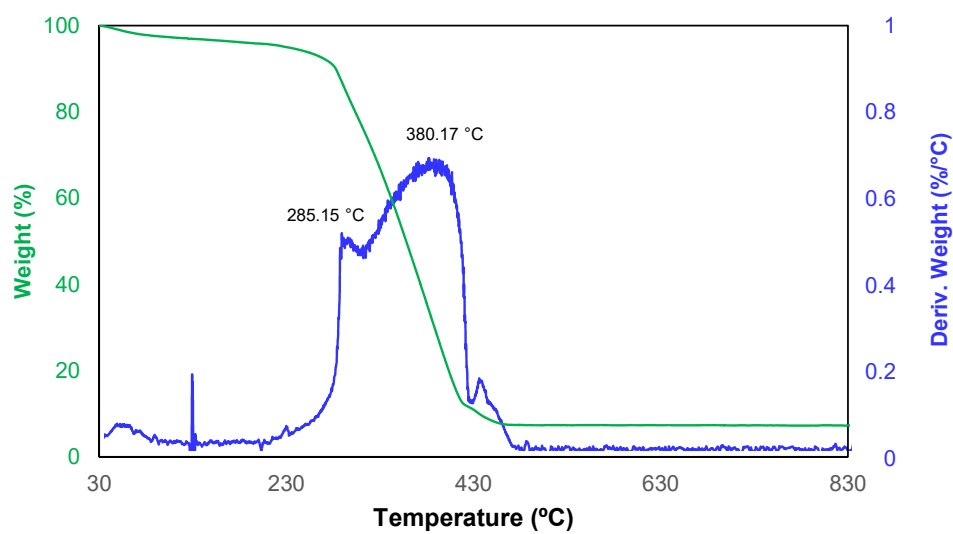

Figure S21. TGA profile of [(S)-PyMe]<sub>0.5</sub>-TPB-DMTP-Polym.

- **Elemental Analysis**

• **[HC≡C]<sub>0.5</sub>-TPB-DMTP-COF**

Calculated - C: 80.75 %, H: 4.84 %, N: 6.73 %

Experimental - C: 78.73 %, H: 5.06 %, N: 6.46 %

Experimental - C: 79.20 %, H: 4.99 %, N: 6.48 %

Experimental - C: 79.04 %, H: 5.05 %, N: 6.47 %

• **[(S)-Py]<sub>0.5</sub>-TPB-DMTP-COF**

Calculated - C: 73.04 %, H: 5.57 %, N: 15.49 %

Experimental - C: 69.47 %, H: 5.48 %, N: 13.75 %

Experimental - C: 69.93 %, H: 5.52 %, N: 13.81 %

Experimental - C: 69.65 %, H: 5.53 %, N: 13.80 %

• **2-step-[(S)-PyMe]<sub>0.5</sub>-TPB-DMTP-COF**

Calculated - C: 73.36 %, H: 5.79 %, N: 15.10 %

Experimental - C: 70.11 %, H: 5.50 %, N: 13.17 %

Experimental - C: 69.69 %, H: 5.40 %, N: 13.17 %

Experimental - C: 70.41 %, H: 5.47 %, N: 13.21 %

• **1-step-[(S)-PyMe]<sub>0.5</sub>-TPB-DMTP-COF**

Calculated - C: 73.36 %, H: 5.79 %, N: 15.10 %

Experimental - C: 70.38 %, H: 5.64 %, N: 13.12 %

Experimental - C: 70.47 %, H: 5.52 %, N: 13.08 %

## - Catalysis heterogeneity test

**Table S3.** Catalytic degradation of diisopropylfluorophosphate (DIFP) nerve agent simulant.

|                                                              | No buffer | Buffer |
|--------------------------------------------------------------|-----------|--------|
| $[\text{HC}\equiv\text{C}]_{0.5}\text{-TPB-DMTP-COF}$        | 83.8      | 100    |
| $[(\text{S})\text{-Py}]_{0.5}\text{-TPB-DMTP-COF}$           | 89.4      | 100    |
| 2-step- $[(\text{S})\text{-PyMe}]_{0.5}\text{-TPB-DMTP-COF}$ | 99.0      | 100    |
| 1-step- $[(\text{S})\text{-PyMe}]_{0.5}\text{-TPB-DMTP-COF}$ | 100       | 100    |
| $[(\text{S})\text{-PyMe}]_{0.5}\text{-TPB-DMTP-Polym}$       | 84.1      | 100    |

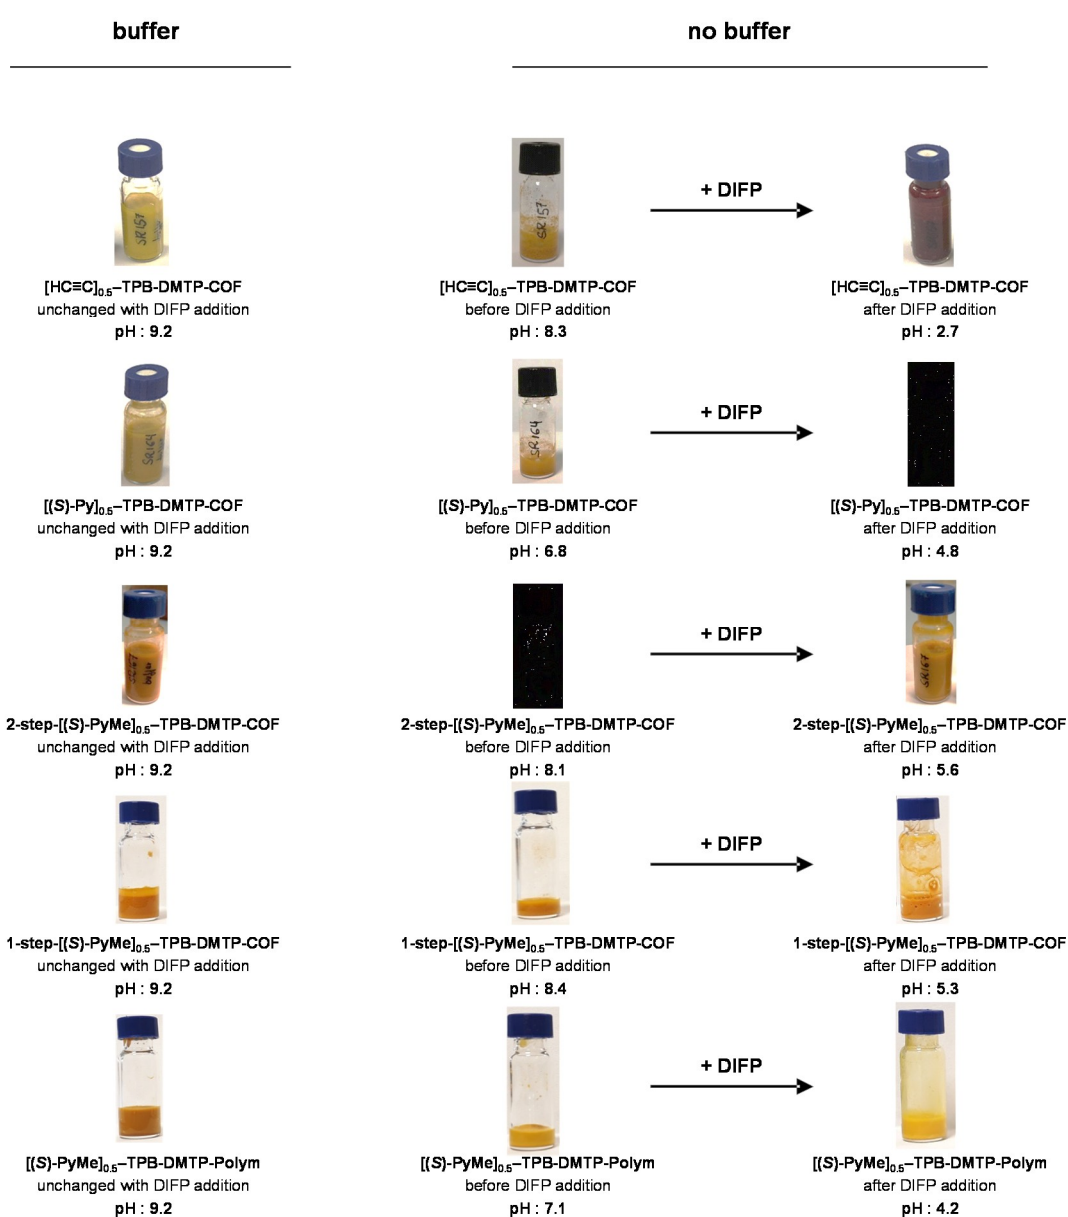**Figure S22.** Effect of DIFP of addition to the essayed COF materials suspension on the pH and color in both buffer and unbuffered conditions.



## - Catalysis in buffered media

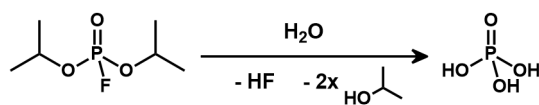

## Buffered media

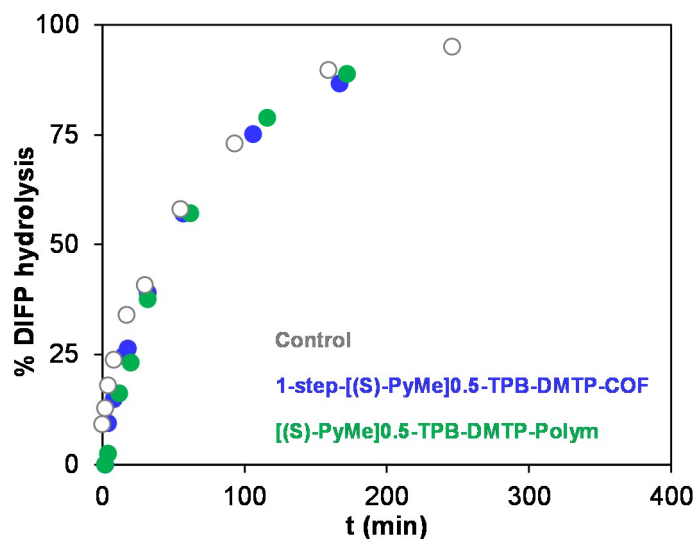

**Figure S23.** DIFP degradation studies in basic *N*-ethylmorpholine buffered media (pH=9.2). Reaction profiles for 1-step-[(S)-PyMe]<sub>0.5</sub>-TPB-DMTP-COF (blue) and [(S)-PyMe]<sub>0.5</sub>-TPB-DMTP-Polym (green).

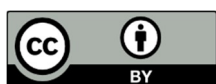

Supplement: s001 [file materials-12-01974-s001.pdf]
